# Supplementary material for: Molecular Detection of Non-O157 Shiga Toxin-Producing Escherichia coli (STEC) Directly from Stool Using Multiplex qPCR Assays
Source: MDPI journal article supplement (doi:10.3390/microorganisms10020329), 2022-01-31
Supplement: s1 [file s1]

**Table S1.** List of all non-top 6 isolates used for inclusivity panel.

| <b>Serotype</b>    | <b>Number of isolates</b> |
|--------------------|---------------------------|
| O5                 | 4                         |
| O8:H14             | 1                         |
| O8:H8              | 1                         |
| O18                | 1                         |
| O22                | 1                         |
| O38                | 2                         |
| O48                | 1                         |
| O55                | 1                         |
| O78                | 1                         |
| O91                | 2                         |
| O113               | 9                         |
| O114               | 1                         |
| O117:H4            | 5                         |
| O117:H7            | 2                         |
| O118: H12          | 1                         |
| O118:H16           | 1                         |
| O118:H30           | 1                         |
| O153               | 1                         |
| O165               | 2                         |
| O174               | 1                         |
| O Undetermined     | 1                         |
| O177               | 1                         |
| OR:H7              | 2                         |
| OR:NM              | 1                         |
| <b>Grand Total</b> | <b>44</b>                 |

**Table S2.** List of all non-top 6 isolates determined by conventional serotyping.

| <b>Serotype</b> | <b>Number of isolates</b> |
|-----------------|---------------------------|
| O Rough         | 3                         |
| O Undetermined  | 15                        |
| O5              | 14                        |
| O6              | 1                         |
| O8              | 1                         |
| O11             | 1                         |
| O16             | 1                         |
| O22             | 1                         |
| O27             | 1                         |
| O38             | 2                         |
| O59             | 1                         |
| O69             | 12                        |
| O71             | 19                        |
| O77             | 1                         |
| O80             | 1                         |
| O84             | 7                         |
| O85             | 2                         |
| O86             | 1                         |

|                    |            |
|--------------------|------------|
| O91                | 1          |
| O100               | 2          |
| O108               | 1          |
| O109               | 1          |
| O113               | 1          |
| O118               | 19         |
| O119               | 1          |
| O123               | 2          |
| O128               | 1          |
| O136               | 1          |
| O142               | 1          |
| O146               | 5          |
| O170               | 1          |
| O172               | 1          |
| O175               | 2          |
| O178               | 1          |
| O182               | 2          |
| O183               | 1          |
| O186               | 9          |
| O187               | 1          |
| <b>Grand Total</b> | <b>138</b> |

**Table S3.** List of discordant samples.

| <b>Discordant Serotypes Between Stool Molecular Serotype and Conventional Isolate Serotype</b> |                              |
|------------------------------------------------------------------------------------------------|------------------------------|
| <b>Direct Serotype</b>                                                                         | <b>Conventional Serotype</b> |
| non-top 6                                                                                      | O103:H2                      |
| non-top 6                                                                                      | O103:H25                     |
| non-top 6                                                                                      | O103:H25                     |
| non-top 6                                                                                      | O121:H19                     |
| O103                                                                                           | O71:H8                       |
| O121                                                                                           | O26:H non motile             |
| O121                                                                                           | O103:H2                      |
| O121                                                                                           | O5:H non motile              |
| O26                                                                                            | O69:H11                      |
| O26                                                                                            | O103:H2                      |
| O26/O111                                                                                       | O118:H2                      |
| <b>Discordant Serotypes Between Broth Molecular Serotype and Conventional Isolate Serotype</b> |                              |
| non-top 6                                                                                      | O111:H Non-motile            |
| non-top 6                                                                                      | O121:H19                     |
| O103                                                                                           | O187:H52                     |
| O103                                                                                           | O Undetermined:H2            |
| O103                                                                                           | O Undetermined:H Non-motile  |
| O103                                                                                           | O69:H11                      |
| O111                                                                                           | O Undetermined:H Nonmotile   |
| O145                                                                                           | O27:H30                      |
| O26                                                                                            | O Undetermined:H Nonmotile   |
